# Supplementary material for: A glimpse into the genetic diversity of the Peruvian seafood sector: Unveiling species substitution, mislabeling and trade of threatened species
Source: PLoS One. 2018 Nov 16;13(11):e0206596. doi: 10.1371/journal.pone.0206596 (PMC6239289; doi:10.1371/journal.pone.0206596)
Supplement: S3 Table — Mislabeled samples are grouped by retailer category and location. (XLSX) [file pone.0206596.s003.xlsx]

## Sheet: S3 Table
S3 Table: Summary list of all mislabeled samples. Mislabeled samples are grouped by retailer category and location.
Retailer category	Location	Sample code	Presentation	Declared as	Expected species	Identified as	Detected species	NCBI ID%	BOLD Similarity %	Detected by FB/MB	Primer name
Fish Landing Site (FLS)	Cancas-TUMBES	SF47	Fresh, whole body	Witch Skate/Raya Bruja	Rostroraja velezi	Shorttail Fanskate/Pastelillo	Sympterygia brevicaudata	99	100	FB	Folmer
Wholesale Fish Market (WFM)	Buenos Aires-LA LIBERTAD	SF50	Fresh, headless	Thresher Shark/Tollo Zorro	Alopias pelagicus	Smooth Hammerhead/ Tiburón Martillo	Sphyrna zygaena	99	100	FB	FISH1
		SF51	Fresh, headless	Thresher Shark/Tollo Zorro	Alopias pelagicus	Smooth Hammerhead/ Tiburón Martillo	Sphyrna zygaena	100	100	FB	FISH1
		SF52	Fresh, headless	Thresher Shark/Tollo Zorro	Alopias pelagicus	Smooth Hammerhead/ Tiburón Martillo	Sphyrna zygaena	100	100	FB	FISH1
		SF53	Fresh, headless	Thresher Shark/Tollo Zorro	Alopias pelagicus	Smooth Hammerhead/ Tiburón Martillo	Sphyrna zygaena	100	100	FB	FISH1
		SF54	Fresh, headless	Thresher Shark/Tollo Zorro	Alopias pelagicus	Smooth Hammerhead/ Tiburón Martillo	Sphyrna zygaena	100	100	FB	FISH1
Market (MK)	Zorritos-TUMBES	SF35	Fresh filet	Shortfin Mako/Tollo Diamante	Isurus oxyrinchus	Thresher Shark/Tiburón Zorro	Alopias pelagicus	100	100	FB	FISH1
	Chiclayo-LAMBAYEQUE	SF62	Fresh filet	Smooth-hound/Tollo	Mustelus sp.	Chilean Eagle Ray/Raya Águila	Myliobatis chilensis	99	99.83	FB	FISH1
		SF63	Dried	Smooth-hound/Tollo	Mustelus sp.	Blue Shark/Tiburón Azul	Prionace glauca	100	100	FB	Folmer
	Trujillo-LA LIBERTAD	SF10	Fresh, headless, no caudal fin	Thresher Shark/Tollo Zorro	Alopias pelagicus	Smooth Hammerhead/ Tiburón Martillo	Sphyrna zygaena	100	100	MB	SH-E
		SF12	Fresh, headless, finless	Smooth-hound/Tollo	Mustelus sp.	Thresher Shark/Tiburón Zorro	Alopias pelagicus	100	100	FB	FISH1
		SF29	Dried salted	Manta/Manta	Mobula sp.	Chilean Eagle Ray/Raya Águila	Myliobatis chilensis	99	99.85	FB	Folmer
	Chimbote-ANCASH	SF118	Fresh, cut in small pieces	Surf Clam/Macha	Mesodesma donacium	Jackknife Clam/Navajuela	Tagelus dombeii	94	99.46	FB	Folmer
		SF106	Fresh, whole body	Grunt/Chita	Anisotremus scapularis	Arnillo Drum/Burro	Cheilotrema fasciatum	93	99.85	FB	FISH1
Super Market Chain (SMC)	Trujillo-LA LIBERTAD	SF58	Refrigerated filet	Guitarfish/Pez Guitarra	Pseudobatos sp.	Chilean Eagle Ray/Raya Águila	Myliobatis chilensis	100	100	FB	FISH1
Multimarket (MM)	Callao-LIMA	SF88	Fresh filet	Sand-Perch/Camotillo	Diplectrum conceptione	Tilapia	Oreochromis sp.	99	100	FB	COI-3
		SF127	Boiled tongues	Surf Clam/Macha	Mesodesma donacium	Jackknife Clam/Navajuela	Tagelus dombeii	94	100	FB	COI-3
		SF131	Frozen filet	Sailfish/Pez Vela	Istiophorus sp.	Atlantic White Marlin/Merlín Blanco	Kajikia albida	99	100	FB	FISH1
Restaurant (RT)	Trujillo-LA LIBERTAD	SF1	Fish fritters	Smooth-hound/Tollo	Mustelus sp.	Smooth Hammerhead/Tiburón Martillo	Sphyrna zygaena	99	100	FB	FISH1
		SF18	Tortilla	Ray/Raya	Eagle rays, Stingrays, Skates species, except for members of genus Mobula (Mantas*)	Giant Devil Ray/Manta	Mobula mobular	100	100	MB	SH-E
		SF19	Fish fritters	Smooth-hound/Tollo	Mustelus sp.	Blue Shark/Tiburón Azul	Prionace glauca	100	100	FB	Folmer
		SF20	Fish fritters	Smooth-hound/Tollo	Mustelus sp.	Blue Shark/Tiburón Azul	Prionace glauca	100	100	FB	Folmer
	Huanchaco-LA LIBERTAD	SF7	Marinated "cebiche"	Grouper/Mero	Epinephelus sp., Mycteroperca sp.	Hake/Merluza	Merluccius gayi	100	100	FB	FISH1
		SF8	Fish fritters	Grape-eye Seabass/Ojo de Uva	Hemilutjanus macrophthalmos	Swordfish/Pez Espada	Xiphias gladius	100	100	MB	SH-D
		SF9	Fish fritters	Grape-eye Seabass/Ojo de Uva	Hemilutjanus macrophthalmos	Swordfish/Pez Espada	Xiphias gladius	100	100	MB	SH-E
		SF17	Steamed filet "sudado"	Grouper/Mero	Epinephelus sp., Mycteroperca sp.	Dolphinfish/Perico	Coryphaena hippurus	99	100	FB	FISH1
		SF25	Steamed filet "sudado"	Corvina	Cilus gilberti	Mocosa Ruff/Cojinoba Mocosa	Schedophilus haedrichi	94	100	FB	FISH1
	Moche-LA LIBERTAD	SF23	Marinated "cebiche"	Corvina	Cilus gilberti	Dolphinfish/Perico	Coryphaena hippurus	99	100	FB	Folmer
	Chimbote-ANCASH	SF71	Fish fritters	Peruvian Rock Seabass/Cabrilla	Paralabrax humeralis	Lumpfish Searobin/Falso Volador, Cabrilla Voladora	Prionotus stephanophrys	99	99.69	FB	FISH1
		SF102	Marinated "cebiche"	Chiton/Barquillo	Chiton sp., Acanthopleura sp.	Jackknife Clam/Navajuela	Tagelus dombeii	94	99.83	FB	Folmer
		SF120	Marinated "cebiche"	Sand-Perch/Camotillo	Diplectrum conceptione	Peruvian Rock Seabass/Cabrilla	Paralabrax humeralis	100	100	FB	FISH1
	Callao-LIMA	SF99	Filet with Menier sauce	Sailfish/Pez Vela	Istiophorus sp.	Dolphinfish/Perico	Coryphaena hippurus	99	100	FB	FISH1
		SF100	Deep fried filet	Sailfish/Pez Vela	Istiophorus sp.	Dolphinfish/Perico	Coryphaena hippurus	99	100	FB	FISH1
		SF121	Fried filet with seafood sauce	Sailfish/Pez Vela	Istiophorus sp.	Dolphinfish/Perico	Coryphaena hippurus	99	100	FB	FISH1
	Miraflores-LIMA	SF130	Stir-fried	Cachema Weakfish/Charela	Cynoscion phoxocephalus	Dolphinfish/Perico	Coryphaena hippurus	100	100	FB	FISH1
*In Peru, species from the genus Mobula are commercially known as "Manta" or "Mantarraya".
Primers:
Fullbarcoding (FB)
FISH1: FishF1 and FishR1 (Ward et al., 2005).
Folmer: LCO1490 and HCO2198 (Folmer et al., 2005).
COI-3: “cocktail” primer set VF2_t1, FishF2_t1, FishR2_t1, and Fr1d_t1 (Ivanova et al., 2007).
Mini-barcoding (MB)
SH-D: Fish_miniD_F_t and Fish_miniD_R_t (Shokralla et al., 2015).
SH-E: Fish_miniE_F_t and Fish_miniE_R_t (Shokralla et al., 2015).
